# Supplementary material for: Basicity-controlled synthesis of Li4Ti5O12nanocrystals by a solvothermal method
Source: Royal Society of Chemistry journal article supplement (doi:10.1039/c4ra06646d), 2014-09-10
Supplement: c4ra06646d1.pdf [file c4ra06646d1.pdf]

## Electric Supplementary Information (ESI)

### Basicity-controlled Synthesis of $\text{Li}_4\text{Ti}_5\text{O}_{12}$ Nanocrystals by a Solvothermal Method

Hiroyuki Kageyama,<sup>a</sup> Yuya Oaki<sup>a</sup> and Hiroaki Imai<sup>\* a</sup>

<sup>a</sup> Department of Applied Chemistry, Faculty of Science and Technology, Keio University, 3-14-1 Hiyoshi, Kohoku-ku, Yokohama, 223-8522, Japan.

\* E-mail: hiroaki@apple.keio.ac.jp

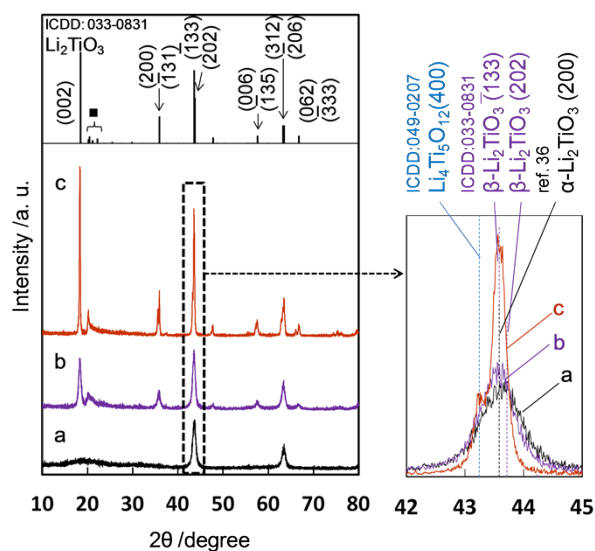

**Figure S1** XRD patterns of the Li-Ti-O precursor obtained in the first step of method I (a), the calcined one at 500°C for 3 h (b), and at 700°C for 3 h(c). The top of this figure shows a diffraction pattern of  $\beta\text{-Li}_2\text{TiO}_3$  (ICDD: 033-0831). ■ (020), (110), (-111), and (021) planes for  $\beta\text{-Li}_2\text{TiO}_3$  appear in the  $2\theta$  range.

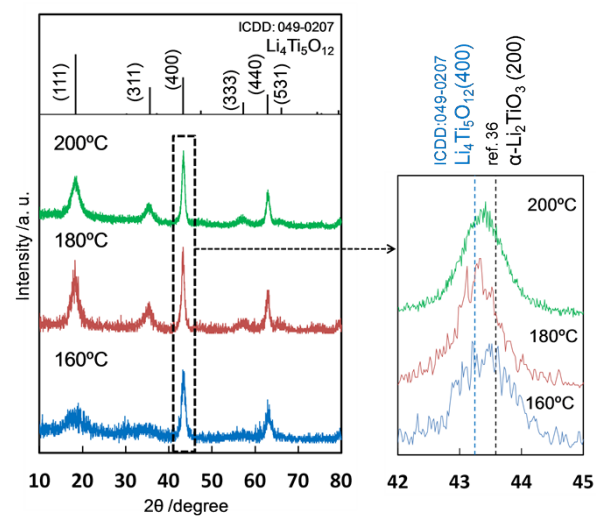

**Figure S2** XRD patterns of products prepared by the one-step two-phase solvothermal process (method II) at a variety of reaction temperatures for 24 h.
